# Supplementary material
Source: Springer Nature journal article supplement (https://www.springermedizin.de/resource/supplementary/12875_2013_878_MOESM3_ESM.pdf/9435722)
Supplement: MOESM3 [file 9435722]

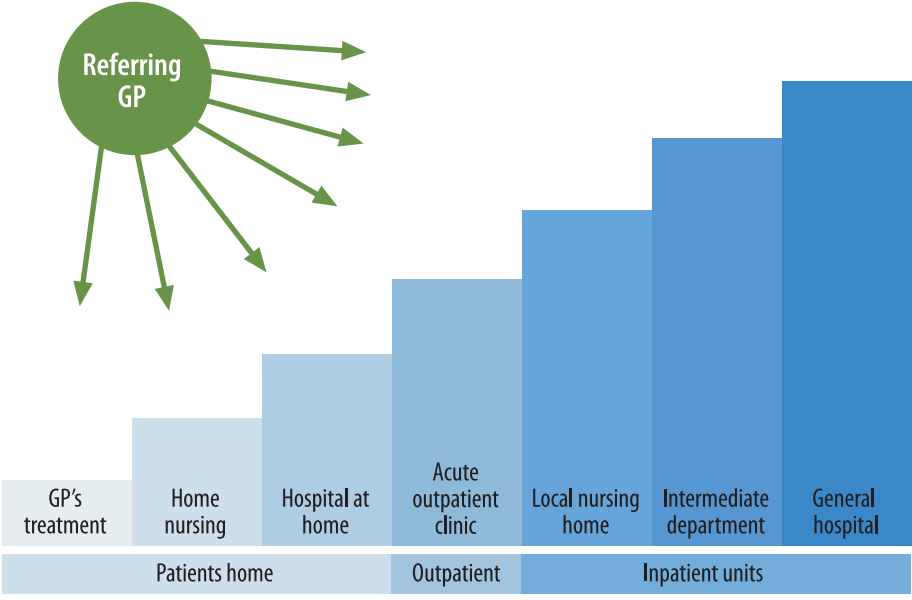

Referring  
GP

GP's  
treatment

Home  
nursing

Hospital at  
home

Acute  
outpatient  
clinic

Local nursing  
home

Intermediate  
department

General  
hospital

Patients home

Outpatient

Inpatient units
